# Supplementary material for: Metabolic Characterization of Advanced Liver Fibrosis in HCV Patients as Studied by Serum 1H-NMR Spectroscopy
Source: PLoS One. 2016 May 9;11(5):e0155094. doi: 10.1371/journal.pone.0155094 (PMC4861296; doi:10.1371/journal.pone.0155094)
Supplement: S5 Table — (A)- Metabolites confirmed to be present in serum. Some of them were identified using 1H monodimensional o bidimensional databases. To confirm their presence in human serum, some pure compounds were added to a mix of healthy human serum samples. Chemical shifts that clearly identify those metabolites in our spectra are shown (B)- Metabolites not confirmed to be present in serum using external compounds. Chemical shifts from every metabolite are shown. (XLSX) [file pone.0155094.s010.xlsx]

## Sheet: Sheet1
		S5 Table. identification of metabolites in NMR serum spectra. (A)- Metabolites confirmed to be present in serum. Some of them were identified using 1H monodimensional o bidimensional databases. To confirm their presence in human serum, some pure compounds were added to a mix of healthy human serum samples. Chemical shifts that clearly identify those metabolites in our spectra are shown (B)- Metab…
		(A)	Metabolite	Observed d1H		(B)	Metabolite	Observed d1H
		1	Citrate	2.55 (d)		55	2- Methylbutyric acid	1.09 (d) 1.43 (m) 1.53 (m) 2.29 (m)
		2	Cysteine	3.04 (m)		56	Adipic acid	1.57 (m) 2.21 (m)
		3	Lactic acid	1.34 (d) 4.13 (q)		57	Aspartic acid	2.68 (dd) 2.83 (dd) 3.91 (dd)
		4	Glutamine	2.46 (m)		58	ATP	6.16 (d) 8.24 (s) 8.56 (s)
		5	Glutamic acid	2.37 (m)		59	D-2-Aminobutyric acid	0.99 (t) 1.91 (m) 3.72 (t)
		6	Isoleucine	0.95(t)		60	DMSO	2.63 (s)
		7	Valine	1.01 (d) 3.62 (d)		61	Folic acid	2.32 (m) 4.32 (m) 6.9 (d) 7.73 (d) 8.65 (s)
		8	Leucine	0.98 (d)		62	Glutation	2.17 (m) 2.57 (m) 2.97 (dd)
		9	Alanine	1.49 (d) 3.79 (q)		63	Hidroxy-Proline	226 (dd) 2.53 (m) 3.39 (dd) 4.22 (dd) 4.60 (d)
		10	3-Hydroxybutyric acid	1.16 (d)		64	Homocysteine	2.17 (m) 2.67 (m)
		11	Lysine	1.92(m)		65	Homoserine	2.04 (m) 2.18 (m) 3.80 (m) 3.86(m)
		12	Arginine	1.69 (m) 1.88 (m)		66	Inosine	6.07 (d)
		13	Nac1	2.07 (s)		67	Methanol	3.37 (s)
		14	Nac2	2.10 (s)		68	MTA	2.13(s) 6.14 (d)
		15	Choline	3.22 (s)		69	Myo-inositol	3.29 (t) 3.55 (dd) 3.64 (t) 4.08 (t)
		16	Creatine	3.04 (s) 3.95 (s)		70	Ornithine	1.83 (m) 3.06 (t)
		17	Creatinine	3.05 (s) 4.07(s)		71	Oxovaleric acid	0.92 (d) 2.61 (d)
		18	Glycerol	3.67 (dd)		72	Putrescine	1.77 (m) 3.06 (t)
		19	TMAO	3.27 (s)		73	Pyridoxine	2.47(s) 7.66 (s)
		20	Isobutyric acid	1.14 (d)		74	Sarcosine	2.75 (s) 3.63 (s)
		21	VLDL1	0.89 (bs)		75	Serine	3.83 (dd) 3.97 (m)
		22	Acetoacetate	2.30 (s)		76	Threonine	1.33 (d) 3.56 (d) 4.25 (m)
		23	VLDL2	1.25 (bs)		77	Uracil	5.81 (d) 7.55 (d)
		24	LDL2	1.23 (m)
		25	Lipid (mainly VLDL2)	1.28 (m)
		26	GPC	3.25 (s)
		27	Glucose b-H2	4.66 (d)
		28	Glucose/Sugars	3.43 (m) 3.7 (m)
		29	α-Glucose	5.25 (d)
		30	Lipids	2.76 (m)
		31	Urea	5.8 (bs)
		32	Fumaric acid	6.6 (s)
		33	Tyrosine	6.9 (m) 7.21 (m)
		34	Histidine	7.04 (s)
		35	Phenylalanine	3.26 (dd)
		36	Hippuric acid	7.82 (dd)
		37	Formic acid	8.47 (s)
		38	Acetic acid	1.93 (s)
		39	Glycine	3.57 (s)
		40	1-Methylhistidine	7.09 (s)
		41	3-Methylhistidine	7.05 (s)
		42	Betaine	3.28 (s) 3.91 (s)
		43	Glycerol	3.67 (dd)
		44	Isopropyl alcohol	1.19 (d)
		45	Tryptophan	7.33 (s) 7.54 (d) 7.74 (d)
		46	Ethanol	1.20 (t) 3.67 (q)
		47	Asparagine	2.90 (dd) 2.93 (dd)
		48	HDL	0.80 (bs)
		49	LDL1	0.84 (bs)
		50	Lipid (albumin lysyl)	3.01 (bs)
		51	Proline	2.05 (m) 4.15 (dd)
		52	Pyruvic acid	2.39 (s)
		53	Carnitine	2.45 (m) 3.28 (s)
		54	Taurine	3.28 (t) 3.44 (t)
